# Supplementary material
Source: PubMed Central journal article supplement (PMC4618095)
Supplement: NIHMS716598-supplement-1.pdf [file NIHMS716598-supplement-1.pdf]

## Supplementary Information

### **Synergistic, collaterally sensitive $\beta$ -lactam combinations suppress resistance in MRSA**

Patrick R. Gonzales<sup>1</sup>, Mitchell W. Pesesky<sup>1</sup>, Renee Bouley<sup>2</sup>, Anna Ballard<sup>1</sup>, Brent A. Biddy<sup>1</sup>, Mark A. Suckow<sup>3</sup>, William R. Wolter<sup>3</sup>, Valerie A. Schroeder<sup>3</sup>, Carey-Ann D. Burnham<sup>4,5</sup>, Shahriar Mobashery<sup>2</sup>, Mayland Chang<sup>2</sup>, Gautam Dantas<sup>1,4,6\*</sup>

<sup>1</sup>Center for Genome Sciences & Systems Biology, Washington University School of Medicine, St. Louis, Missouri 63108, USA. <sup>2</sup>Department of Chemistry and Biochemistry, University of Notre Dame, Notre Dame, Indiana 46556, USA. <sup>3</sup>Freimann Life Sciences Center and Department of Biological Sciences, University of Notre Dame, Notre Dame, Indiana 46556, USA. <sup>4</sup>Department of Pathology and Immunology, Washington University School of Medicine, St. Louis, Missouri 63110, USA. <sup>5</sup>Department of Pediatrics, Washington University School of Medicine, St. Louis, Missouri 63110, USA. <sup>6</sup>Department of Biomedical Engineering, Washington University in St. Louis, St. Louis, Missouri 63130, USA. \*e-mail: [dantas@wustl.edu](mailto:dantas@wustl.edu)

This file includes Supplementary Results (Supplementary Figures/Legends 1 – 3, Supplementary Tables 1 – 7).

## Supplementary Results

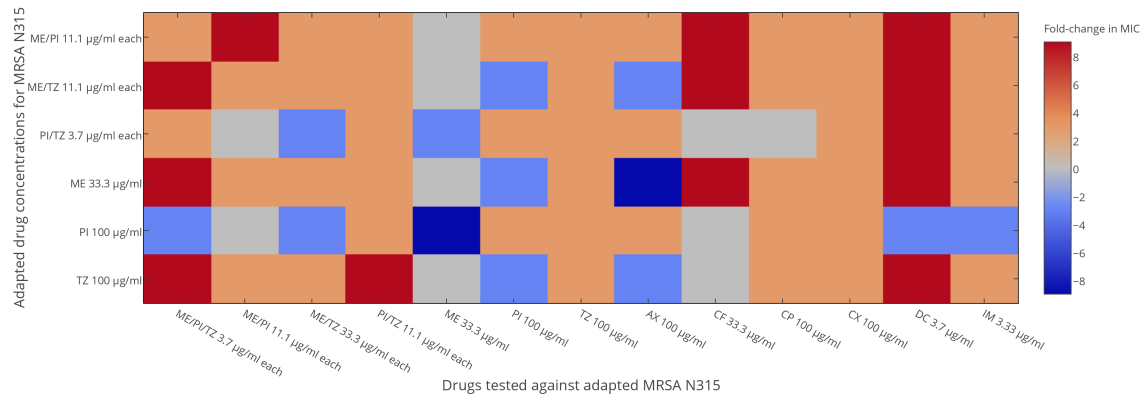

**Supplementary Figure 1. Collateral sensitivities underlie suppression of adaptation to  $\beta$ -lactam combinations in MRSA N315.** MRSA N315 adapted to single  $\beta$ -lactam drugs, or drugs in combinations after 11-day passage, with the concentrations of drug adaptation, is listed along the Y-axis. Subsequent screening of the adapted MRSA N315 strains against  $\beta$ -lactam combinations or single drugs is shown along the X-axis, along with the wild-type MIC of the drug(s) against MRSA N315. Blue shades indicate collateral sensitization of a MRSA N315 strain to single drugs and/or combinations, after prior adaptation to single and/or double drug combinations. Red shades indicate collateral resistance. Grey shading indicates no change in MIC. Darker shading indicates increased fold-change for the MIC of adapted MRSA N315 to the drug(s) tested after adaptation. For example, adaptation of MRSA N315 to piperacillin (PI) after growth in CAMHB+PI 100  $\mu$ g/ml yields collateral sensitivity to meropenem (ME), as shown by a 9-fold drop in MIC of ME. Adaptation of MRSA N315 to CAMHB+ME 33.3  $\mu$ g/ml results in a 3-fold drop in MIC of PI, indicative of reciprocal collateral sensitivity of MRSA N315 to these two  $\beta$ -lactam drugs. MIC values for ME/PI/TZ against MRSA N315 from each compound or combination in column 1 is reflected in Supplementary Table 6, Row 11.

ME = meropenem, PI = piperacillin, TZ = tazobactam, AX = amoxicillin, CF = cefdinir,  
CP = cefepime, CX = ceftiofloxacin, DC = dicloxacillin, IM = imipenem.

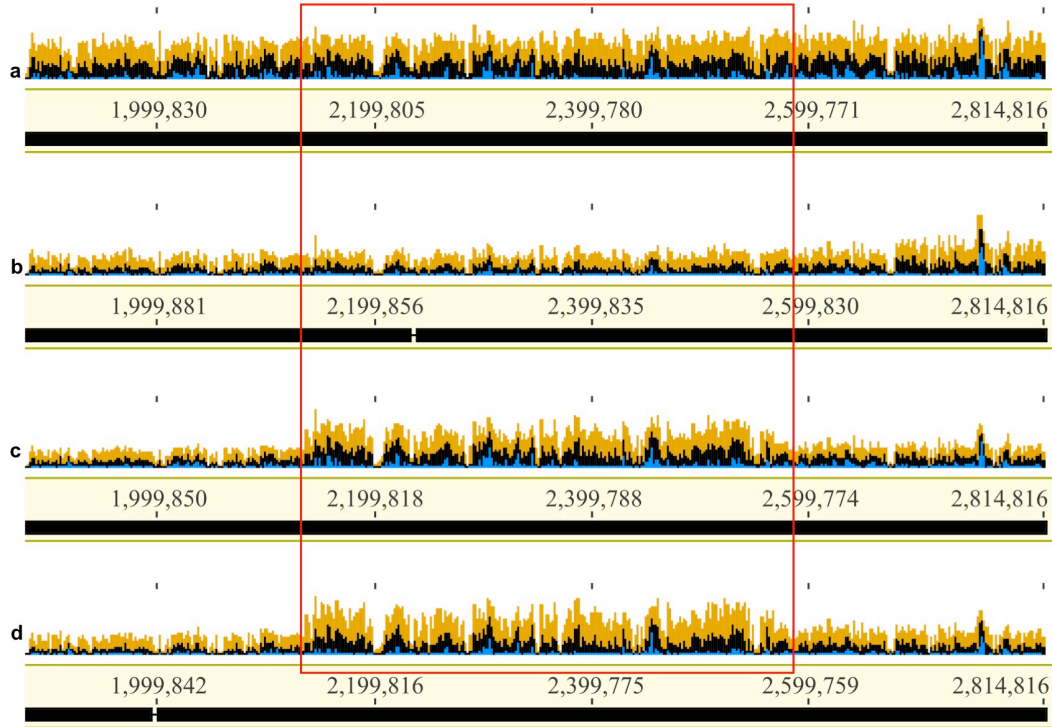

**Supplementary Figure 2. Genomic duplication in MRSA N315 adapted to piperacillin/tazobactam.** Histogram showing the total read coverage across the genome of N315 adapted to **a**, meropenem/tazobactam for five days, **b**, tazobactam alone for two days, **c**, piperacillin/tazobactam for six days, and **d**, piperacillin/tazobactam for 11 days. Average per-base read coverage across the entire genome and only in the region indicated by the red box are, respectively: a) 116.6 reads/bp and 126.6 reads/bp; b) 124.5 reads/bp and 128.9 reads/bp; c) 157.8 reads/bp and 302.2 reads/bp; and d) 120.1 reads/bp and 230.6 reads/bp. Clones in **a** and **b** were chosen to be representative of all non-piperacillin/tazobactam adaptations.

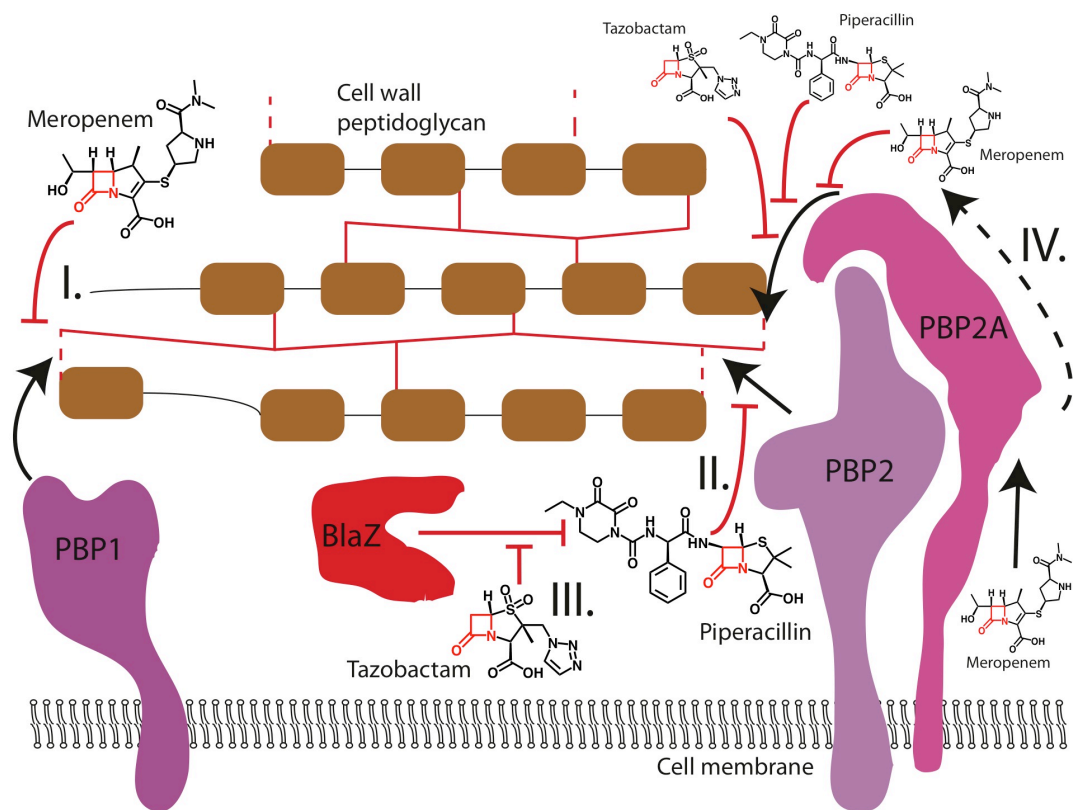

**Supplementary Figure 3. Proposed mechanism of synergy of meropenem/piperacillin/tazobactam (ME/PI/TZ) against MRSA.** Our data support the proposed synergistic mode of action against cell-wall synthesis in MRSA involving: I.) suppression of transpeptidation by PBP1 at the division septum by carbapenems, II.) suppression of transpeptidation by PBP2 by penams (penicillins), III.) suppression of  $\beta$ -lactamase activity against penams by  $\beta$ -lactamase inhibitors, and IV.) allosteric opening of the active site of PBP2a by meropenem, allowing inhibition by meropenem or by other  $\beta$ -lactams.

**Supplementary Table 1. 23 antibacterial compounds used to formulate combinations in this study.** Compounds are grouped by target mechanism of action.

\*Compound not formally classified as an antibiotic drug, but has known antibacterial properties.

| Compound         | Target mechanism in bacteria | Antibiotic Class                                              | MIC in MRSA N315 (µg/ml) |
|------------------|------------------------------|---------------------------------------------------------------|--------------------------|
| Sulfamethoxazole | folic acid pathway           | Sulfonamide                                                   | 100                      |
| Trimethoprim     | folic acid pathway           | Pyrimidine derivative                                         | 6.2                      |
| Levofloxacin     | DNA synthesis                | Fluoroquinolone                                               | 0.4                      |
| Bleomycin        | DNA synthesis                | Glycopeptide                                                  | >500                     |
| Gemfibrozil      | lipid synthesis              | *Fibrate (hyperlipidemia agent)                               | >200                     |
| Sulfometuron     | amino acid biosynthesis      | *Broad-spectrum urea herbicide                                | >200                     |
| Disulfiram       | osmotic stress response      | *Thiuram disulfide (anti-alcohol therapeutic)                 | 11.1                     |
| Tigecycline      | protein synthesis            | Tetracycline                                                  | 0.4                      |
| Mupirocin        | protein synthesis            | Pseudomonic acid                                              | 0.4                      |
| Linezolid        | protein synthesis            | Oxazolidinone                                                 | 3.7                      |
| Azithromycin     | protein synthesis            | Macrolide                                                     | >200                     |
| Clindamycin      | protein synthesis            | Lincosamide                                                   | >500                     |
| Chloramphenicol  | protein synthesis            | Amphenicol                                                    | 11.1                     |
| Tobramycin       | protein synthesis            | Aminoglycoside                                                | >500                     |
| Rifampin         | transcription                | Rifamycin                                                     | 0.4                      |
| Vancomycin       | cell wall synthesis          | Glycopeptide                                                  | 0.4                      |
| Piperacillin     | cell wall synthesis          | β-lactam/Penicillin (Penam)/Broad-spectrum                    | 64                       |
| Aztreonam        | cell wall synthesis          | β-lactam/Monobactam/Gram-negative specific                    | >500                     |
| Cefepime         | cell wall synthesis          | β-lactam/Cephalosporin 4th generation (Cephem)/Broad-spectrum | 100                      |
| Meropenem        | cell wall synthesis          | β-lactam/Carbapenem/Ultra-broad-spectrum                      | 16                       |
| Tazobactam       | cell wall synthesis          | β-lactamase inhibitor (Penam)                                 | 128                      |
| D-Cycloserine    | cell wall synthesis          | Analogue of the amino acid D-alanine                          | 56                       |
| Colistin         | cell membrane lysis          | Polymyxin                                                     | 500                      |

**Supplementary Table 2. Fractional Inhibitory Concentration Index (FICI) profiling of combinations. a**, Interpretive criteria for FICI scoring. **b**, FICI profiles of various triple combinations of carbapenems/penicillins/ $\beta$ -lactamase inhibitors against MRSA and MSSA strains. **c**, MIC profiles of same combinations ( $\mu\text{g/ml}$ ). Constituent double combinations are shown for comparison.

**a**

| FICI             | Interpretation  |
|------------------|-----------------|
| $\leq 0.5$       | Synergy         |
| $>0.5$ to $<1.0$ | Partial synergy |
| 1.0              | Additivity      |
| $>1.0$ to $<4.0$ | Indifference    |
| $\geq 4.0$       | Antagonism      |

**b**

| Combination in strain                      | ME/PI/TZ | CP/PI/TZ | AZ/PI/TZ | ME/AX/TZ | ME/AX/CV | IM/PI/CV | ME/PI | ME/TZ | PI/TZ | IM/PI | IM/CV | PI/CV |
|--------------------------------------------|----------|----------|----------|----------|----------|----------|-------|-------|-------|-------|-------|-------|
| MRSA N315<br>SCC <sub>mec</sub><br>type II | 0.11     | 0.33     | 0.33     | 0.04     | 0.41     | 0.06     | 0.44  | 0.67  | 0.22  | 0.15  | 0.67  | 0.44  |
| MRSA #181<br>SCC <sub>mec</sub><br>type II | 0.28     | ND       | ND       | 0.55     | ND       | 0.11     | ND    | ND    | ND    | ND    | ND    | ND    |
| MSSA<br>ATCC<br>29213                      | 1.12     | ND       | ND       | ND       | ND       | 1.14     | 2.97  | 8.61  | 0.36  | 1.11  | 1.04  | 0.43  |

**c**

| Combination in strain                      | ME/PI/TZ  | CP/PI/TZ  | AZ/PI/TZ  | ME/AX/TZ  | ME/AX/CV | IM/PI/CV     | ME/PI    | ME/TZ    | PI/TZ    | IM/PI    | IM/CV     | PI/CV     |
|--------------------------------------------|-----------|-----------|-----------|-----------|----------|--------------|----------|----------|----------|----------|-----------|-----------|
| MRSA N315<br>SCC <sub>mec</sub><br>type II | 2 each    | 11.1 each | 11.1 each | 0.4 each  | 3.7 each | 0.12/1.2/1.2 | 2/4      | 8/2      | 16/2     | 0.37/3.7 | 1.11/11.1 | 11.1 each |
| MRSA #181<br>SCC <sub>mec</sub><br>type II | 11.1 each | ND        | ND        | 11.1 each | ND       | 0.37/3.7/3.7 | ND       | ND       | ND       | ND       | ND        | ND        |
| MSSA ATCC<br>29213                         | 0.27 each | ND        | ND        | ND        | ND       | 0.04/0.4/0.4 | 0.4 each | 1.2 each | 1.2 each | 0.04/0.4 | 0.04/0.4  | 1.2 each  |

**Supplementary Table 3. Compiled FICI data for ME/PI/TZ against MRSA N315 and 72 clinical MRSA isolates. a, b, 72 clinical MRSA isolates (with SCC<sub>mec</sub> type, if known) and FICI scores for ME/PI/TZ against 72 clinical MRSA isolates.**



**a**

| Clinical MRSA isolate<br>(SCCmec type) | FICI score |
|----------------------------------------|------------|
| 4                                      | 0.22       |
| 7                                      | 0.22       |
| 13                                     | 0.15       |
| 15                                     | 0.5        |
| 22                                     | 0.22       |
| 25                                     | 0.22       |
| 27                                     | 0.67       |
| 31                                     | 0.15       |
| 35 (II)                                | 0.17       |
| 37                                     | 0.15       |
| 39 (II)                                | 0.67       |
| 41 (II)                                | 0.09       |
| 45                                     | 0.22       |
| 48                                     | 0.15       |
| 53                                     | 0.22       |
| 59                                     | 0.07       |
| 64 (II)                                | 0.44       |
| 66                                     | 0.22       |
| 70                                     | 0.67       |
| 72                                     | 0.15       |
| 73 (IV)                                | 0.34       |
| 74                                     | 0.34       |
| 75                                     | 0.34       |
| 77 (II)                                | 0.67       |
| 85                                     | 0.5        |
| 89                                     | 0.07       |
| 90                                     | 0.22       |
| 95                                     | 0.22       |
| 99                                     | 0.44       |
| 101                                    | 0.22       |
| 103                                    | 0.37       |
| 104 (II)                               | 0.15       |
| 109                                    | 0.17       |
| 118                                    | 0.07       |
| 121                                    | 0.22       |
| 122                                    | 0.22       |

**b**

| Clinical MRSA isolate<br>(SCCmec type) (Continued) | FICI score (Continued) |
|----------------------------------------------------|------------------------|
| 124                                                | 0.28                   |
| 131 (II)                                           | 0.37                   |
| 132                                                | 0.22                   |
| 140                                                | 0.22                   |
| 144                                                | 0.15                   |
| 146                                                | 0.22                   |
| 150                                                | 0.67                   |
| 152                                                | 0.22                   |
| 155                                                | 0.39                   |
| 161                                                | 0.37                   |
| 163                                                | 0.37                   |
| 164                                                | 0.17                   |
| 165                                                | 0.15                   |
| 167                                                | 0.22                   |
| 168                                                | 0.22                   |
| 169                                                | 0.17                   |
| 171                                                | 0.17                   |
| 172                                                | 0.67                   |
| 175                                                | 0.15                   |
| 177                                                | 0.22                   |
| 181 (II)                                           | 0.28                   |
| 182                                                | 0.5                    |
| 189                                                | 0.15                   |
| 190                                                | 0.34                   |
| 193 (II)                                           | 0.34                   |
| 194                                                | 0.15                   |
| 195                                                | 0.15                   |
| 197                                                | 0.15                   |
| 200                                                | 0.15                   |
| 201                                                | 0.44                   |
| 204                                                | 0.39                   |
| 205                                                | 0.22                   |
| 206                                                | 0.22                   |
| 213                                                | 0.44                   |
| 217                                                | 0.15                   |
| 219                                                | 0.15                   |

**Supplementary Table 4. Compiled MIC and MBC data for ME/PI/TZ against MRSA isolates.** **a**, Distribution of MIC resistance profiles of studied MRSA isolates against ME/PI/TZ. **b**, Confirmation of minimum bactericidal concentration (MBC) for ME/PI/TZ in MRSA N315. MRSA N315 was grown overnight at 37 °C in CAMHB media + indicated concentrations of ME/PI/TZ per well, in triplicate. \* indicates liquid MIC of MRSA N315. 100 µl aliquots of 1:100 dilutions of 50 µl MRSA N315 culture from wells containing ME/PI/TZ at indicated concentrations were plated in duplicate onto MHA plates and incubated for 24 h. No colony growth at or two dilutions above the MIC confirmed bactericidal activity.

**a**

| MIC of ME/PI/TZ components (µg/ml) | # of MRSA isolates | % of total |
|------------------------------------|--------------------|------------|
| 33.3/33.3/33.3                     | 9                  | 12.3       |
| 11.1/11.1/11.1                     | 27                 | 36.9       |
| 3.7/3.7/3.7                        | 27                 | 36.9       |
| 1.2/1.2/1.2                        | 8                  | 10.9       |
| 0.4/0.4/0.4                        | 2                  | 2.7        |
| Total                              | 73                 | -          |

**b**

| Plate Concentrations | Colonies Plate A | Colonies Plate B  |
|----------------------|------------------|-------------------|
| ME/PI/TZ 2/2/2       | Punctate lawn    | Too Many to Count |
| ME/PI/TZ 4/4/4*      | 40               | 0                 |
| ME/PI/TZ 8/8/8       | 2                | 0                 |
| ME/PI/TZ 16/16/16    | 0                | 0                 |
| ME/PI/TZ 32/32/32    | 8                | 0                 |

\*MIC = 4/4/4 ng/µl

**Supplementary Table 5. Xylose induction of hypersusceptibility to  $\beta$ -lactams in MRSA COL antisense (AS) strains confirms mechanism of action against critical PBPs.** Targeted repression of critical PBPs in a MRSA COL background showed increased susceptibility for  $\beta$ -lactams in the ME/PI/TZ combination when under xylose induction, resulting in differential zones of inhibition (ZOI) size (+++, more than twofold increase in zone diameter with xylose induction. ++, twofold increase in zone diameter. +, less than twofold increase. -, no change in zone diameter.). TZ showed no inhibition of any growth on any plate  $\pm$  xylose. Targeted repression of PBP2a showed increased susceptibility for meropenem, piperacillin, and all combinations. Targeted repression of PBP1 showed increased susceptibility to meropenem, piperacillin, and for the ME/PI, ME/TZ, and ME/PI/TZ combinations. Targeted repression of PBP2 showed increased susceptibility to meropenem, piperacillin, and for all combinations. Targeted repression of PBP3 showed a slight increase in susceptibility for the ME/PI combination; no change in susceptibility was observed for any of the single drugs, or other combinations.

| Antibiotic | Antisense RNA $\pm$ xylose |      |      |      |
|------------|----------------------------|------|------|------|
|            | PBP2a                      | PBP1 | PBP2 | PBP3 |
| ME         | +++                        | +    | ++   | -    |
| PI         | +++                        | +    | +++  | -    |
| ME/PI      | +++                        | +++  | +++  | +    |
| ME/TZ      | +++                        | +++  | +++  | -    |
| PI/TZ      | +++                        | -    | +++  | -    |
| ME/PI/TZ   | +++                        | +++  | +++  | -    |

**Supplementary Table 6. Change in ME/PI/TZ resistance phenotype of MRSA N315 over 11 days after repeated exposure to constituents of ME/PI/TZ. a, Wild-type MIC of ME/PI/TZ against MRSA N315 is 3.7 µg/ml each. Isolates were selected on days when an increase in MIC or growth rate was noted. Antibacterial concentrations listed (in µg/ml) show the adaptation conditions for MRSA N315. Post-adaptation MICs to each component of ME/PI/TZ are shown in selected isolates versus passage day. Outlined isolates from passage-day 11 were used in the adaptation assay shown in Fig. S1. b, FICI of MRSA N315 against ME/PI/TZ after adaptation to components *in vitro*.**

**a**

| Passage day            | ME/PI              | ME/TZ              | PI/TZ             | Meropenem      | Piperacillin | Piperacillin | Tazobactam     |
|------------------------|--------------------|--------------------|-------------------|----------------|--------------|--------------|----------------|
| /Adaptation conditions | 11.1 µg/ml<br>each | 11.1 µg/ml<br>each | 3.7 µg/ml<br>each | 33.3 µg/ml     | 100 µg/ml    | 33.3µg/ml    | 100 µg/ml      |
| 1                      | no change          | 11.1/11.1/11.1     | 1.2/1.2/1.2       | 11.1/11.1/11.1 | no change    | 1.2/1.2/1.2  | 11.1/11.1/11.1 |
| 2                      | no change          | no change          | no change         | no change      | 3.7/3.7/3.7  | 3.7/3.7/3.7  | 11.1/11.1/11.1 |
| 3                      | no change          | no change          | no change         | no change      | no change    | no change    | no change      |
| 4                      | no change          | no change          | no change         | no change      | no change    | no change    | no change      |
| 5                      | no change          | 33.3/33.3/33.3     | no change         | no change      | no change    | no change    | no change      |
| 6                      | no change          | no change          | 11.1/11.1/11.1    | no change      | no change    | no change    | no change      |
| 7                      | 11.1/11.1/11.1     | no change          | no change         | 33.3/33.3/33.3 | no change    | no change    | 11.1/11.1/11.1 |
| 8                      | no change          | no change          | no change         | no change      | 1.2/1.2/1.2  | 1.2/1.2/1.2  | no change      |
| 9                      | no change          | no change          | no change         | no change      | no change    | no change    | no change      |
| 10                     | no change          | no change          | no change         | no change      | no change    | no change    | no change      |
| 11                     | 11.1/11.1/11.1     | 33.3/33.3/33.3     | 11.1/11.1/11.1    | 33.3/33.3/33.3 | 1.2/1.2/1.2  | 1.2/1.2/1.2  | 33.3/33.3/33.3 |

**b**

| MRSA N315 isolate adapted to: | ME/PI | ME/TZ | PI/TZ | ME   | PI   | TZ   |
|-------------------------------|-------|-------|-------|------|------|------|
| FICI <sub>ME/PI/TZ</sub>      | 0.22  | 0.83  | 0.22  | 0.83 | 0.05 | 0.83 |

**Supplementary Table 7. a**, Statistics of *in vivo* treatments with  $\beta$ -lactams. **b**, *in vitro* MICs and FICI scores for MRSA N315 after passage *in vivo* under indicated drug conditions.

**a**

| Drug condition tested | p-value versus vehicle | After multiple hypothesis correction (Bonferroni) |
|-----------------------|------------------------|---------------------------------------------------|
| ME                    | 0.606                  | 4.848 (1)                                         |
| PI                    | 1                      | 8 (1)                                             |
| TZ                    | 1                      | 8 (1)                                             |
| ME/PI                 | 0.0022                 | 0.0176                                            |
| ME/TZ                 | 0.0152                 | 0.1216                                            |
| PI/TZ                 | 0.606                  | 4.848 (1)                                         |
| ME/PI/TZ              | 0.0022                 | 0.0176                                            |
| Linezolid             | 0.0022                 | 0.0176                                            |

**b**

| Colonies from mice given:     | ME          | PI          | Vehicle     | Wild-type N315 |
|-------------------------------|-------------|-------------|-------------|----------------|
| MIC ( $\mu\text{g/ml}$ ) for: |             |             |             |                |
| ME/PI/TZ                      | 3.7/3.7/3.7 | 3.7/3.7/3.7 | 3.7/3.7/3.7 | 3.7/3.7/3.7    |
| ME                            | 33.3        | 33.3        | 33.3        | 33.3           |
| PI                            | 33.3        | 33.3        | 33.3        | 33.3           |
| TZ                            | 100         | 100         | 100         | 100            |
| FICI                          | 0.26        | 0.26        | 0.26        | 0.26           |

## **Supplementary Dataset**

### ***In vivo* data for ME/PI/TZ, constituent compounds, and controls in neutropenic**

**mice.** This supplementary dataset comprises the *in vivo* testing of ME/PI/TZ, its constituent compounds, vehicle (–), and linezolid (+) controls, against neutropenic mice, over the 48 h time course of drug administration. Also included are final results of drug treatments in the replicate mice ( $n = 6$  per treatment).
